# Supplementary figures and images for: Predictive genetic testing for the identification of high-risk groups: a simulation study on the impact of predictive ability
Source: Springer Nature journal article supplement (doi:10.1186/gm267), 2011-07-28

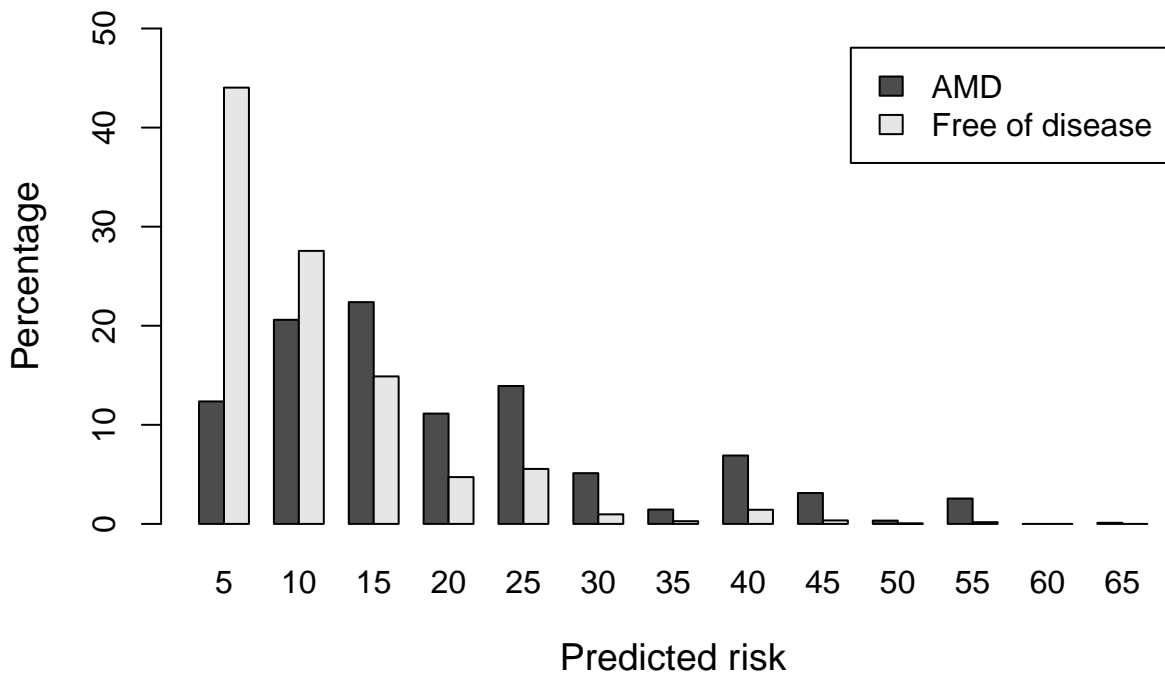

Supplement: Additional file 4 [file gm267-s4.pdf]
